# Supplementary material
Source: PubMed Central journal article supplement (PMC8005743)
Supplement: Supplementary_Data.pdf [file Supplementary_Data.pdf]

Figure S1. Verification of exosomes isolated from plasma of patients with atopic dermatitis and controls. The morphology of exosomes was analyzed by transmission electron microscopy. (A) Magnified window displaying an exosome (scale bar, 100 nm) and (B) original microscopy image (scale bar, 200 nm).

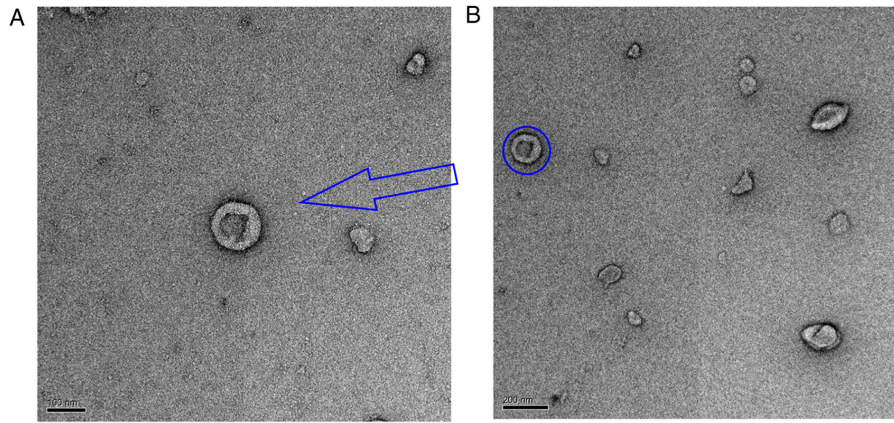

Table SI. Differentially expressed 135 tRFs in 3 subjects with AD compared with 3 controls.

| Differentially expressed tRF | log2FC   | P-value  | FDR      | Direction of differential expression |
|------------------------------|----------|----------|----------|--------------------------------------|
| tRF-23-YOHR6HFRD2            | -1.2685  | 0.031536 | 0.994352 | Down                                 |
| tRF-23-7SIRM1DVV             | -2.55918 | 0.049535 | 0.994352 | Down                                 |
| tRF-24-0P58309N0Y            | 2.41805  | 0.035894 | 0.994352 | Up                                   |
| tRF-33-Q99P9P9NH57SD3        | -1.30854 | 0.022121 | 0.994352 | Down                                 |
| tRF-35-ZH0SR9593KMH26        | -1.45403 | 0.047201 | 0.994352 | Down                                 |
| tRF-28-8W1W18YMENDM          | -4.12706 | 0.014224 | 0.888916 | Down                                 |
| tRF-31-SWRNLJK578Q1B         | -1.89003 | 0.012825 | 0.888916 | Down                                 |
| tRF-23-YOH9R8O7D2            | -1.37104 | 0.02499  | 0.994352 | Down                                 |
| tRF-39-81PV6RRNLNK88KHR      | -1.3637  | 0.049594 | 0.994352 | Down                                 |
| tRF-24-7SFR06RDI2            | -1.92632 | 0.046661 | 0.994352 | Down                                 |
| tRF-26-7JPJ60MV9JD           | -1.53969 | 0.026355 | 0.994352 | Down                                 |
| tRF-22-W0K6MY6V2;tsRNA-3016b | -1.93072 | 0.009829 | 0.822962 | Down                                 |
| tRF-33-QJ3KYU4RRWRBD2        | -1.58707 | 0.00713  | 0.772832 | Down                                 |
| tRF-39-D112Z4R95MK19K2V      | -1.65806 | 0.043211 | 0.994352 | Down                                 |
| tRF-25-6VF8DHXY6R            | -1.40243 | 0.041839 | 0.994352 | Down                                 |
| tRF-28-4W9MVKS4I7D4          | -1.76435 | 0.026769 | 0.994352 | Down                                 |
| tRF-20-BMWIRJ46              | -2.31424 | 0.002966 | 0.697184 | Down                                 |
| tRF-29-K87SHRMFWRE2          | -1.32529 | 0.037239 | 0.994352 | Down                                 |
| tRF-18-R2YJ8B04              | 3.332548 | 0.02599  | 0.994352 | Up                                   |
| tRF-16-R2YJ8BE               | 4.227175 | 0.009706 | 0.822727 | Up                                   |
| tRF-30-08R959KUMKF6          | -3.21716 | 0.005352 | 0.732287 | Down                                 |
| tRF-30-924ZDRJKW4R9          | -4.50203 | 0.004876 | 0.732287 | Down                                 |
| tRF-29-QSZ34KRQ59J4          | -1.79817 | 0.028945 | 0.994352 | Down                                 |
| tsRNA-1042                   | 2.396607 | 0.007066 | 0.772832 | Up                                   |
| tRF-22-YO9LON4V3             | 2.162672 | 0.047529 | 0.994352 | Up                                   |
| tRF-37-YO1N7KYUSR0P1SJ       | 2.377141 | 0.045827 | 0.994352 | Up                                   |
| tRF-26-18LPMBQ4NKD           | -2.38053 | 0.003437 | 0.732287 | Down                                 |
| tsRNA-1039                   | 1.519095 | 0.03636  | 0.994352 | Up                                   |
| tRF-23-YRL51NLED3            | 3.38037  | 0.045764 | 0.994352 | Up                                   |
| tRF-18-HRH7MSD2              | -2.24414 | 0.049262 | 0.994352 | Down                                 |
| tRF-18-RKVP4P04              | 2.297663 | 0.029378 | 0.994352 | Up                                   |
| tRF-24-7617M4O1J2            | -1.30818 | 0.041728 | 0.994352 | Down                                 |
| tRF-30-SV9NLN3JWB61          | -1.22705 | 0.026499 | 0.994352 | Down                                 |
| tRF-31-RR93W0K67205D         | -2.55569 | 0.033211 | 0.994352 | Down                                 |
| tRF-32-I7XUK87SIRMJ4         | -2.20047 | 0.047666 | 0.994352 | Down                                 |
| tRF-16-HR6HFRD               | -1.66417 | 0.048209 | 0.994352 | Down                                 |
| tRF-20-593KMH26              | -1.81403 | 0.048627 | 0.994352 | Down                                 |
| tRF-21-LI38NJW1B             | -1.86273 | 0.040776 | 0.994352 | Down                                 |
| tRF-20-PJ58309N              | 4.648888 | 0.005132 | 0.732287 | Up                                   |
| tRF-31-OSRNLNKSEK51B         | -2.3534  | 0.025061 | 0.994352 | Down                                 |
| tRF-24-19BMWIRJHJ            | -1.70158 | 0.047988 | 0.994352 | Down                                 |
| tRF-24-7SB1RFOJE2            | 3.341443 | 0.024153 | 0.994352 | Up                                   |
| tRF-17-69JP4P4               | 3.587934 | 0.02951  | 0.994352 | Up                                   |
| tRF-30-PNR8YO9LON4V          | 1.541294 | 0.013419 | 0.888916 | Up                                   |
| tRF-28-WIR959MIL0DR          | -1.71543 | 0.042725 | 0.994352 | Down                                 |
| tRF-38-YO1N3KYUSR681SD2      | 1.762206 | 0.033763 | 0.994352 | Up                                   |
| tRF-50-QNR8VP94FQFY392J1Y0S  | -1.69884 | 0.03953  | 0.994352 | Down                                 |
| tRF-27-WJ9X0UD394N           | 2.898511 | 0.006128 | 0.732287 | Up                                   |
| tRF-18-Y9Q867D2              | -2.02018 | 0.036283 | 0.994352 | Down                                 |
| tRF-30-8HM2OSRNLNKS          | -2.50697 | 0.045139 | 0.994352 | Down                                 |
| tRF-17-8SOUPR2               | -1.45005 | 0.045613 | 0.994352 | Down                                 |
| tRF-27-L38BWSNKP92           | -1.50964 | 0.04234  | 0.994352 | Down                                 |
| tRF-27-M3WEKSPM852           | -1.68534 | 0.023345 | 0.994352 | Down                                 |
| tRF-23-R2YJ8B9LDS            | 2.439466 | 0.026269 | 0.994352 | Up                                   |
| tRF-17-8871KR2               | 2.272667 | 0.039795 | 0.994352 | Up                                   |
| tRF-22-WEK5KKOV2             | -2.69813 | 0.025327 | 0.994352 | Down                                 |
| tRF-19-IRM1JVE2              | -3.33102 | 0.041557 | 0.994352 | Down                                 |
| tRF-34-LR6XQ6S8V0J8HW        | -1.53068 | 0.042545 | 0.994352 | Down                                 |
| tRF-21-LM4V9K3RB             | -4.1336  | 0.014372 | 0.888916 | Down                                 |

Table SI. Continued.

| Differentially expressed tRF | log2FC   | P-value  | FDR      | Direction of differential expression |
|------------------------------|----------|----------|----------|--------------------------------------|
| tRF-30-4W9MVKS4I7MN          | -2.40645 | 0.002343 | 0.685353 | Down                                 |
| tRF-22-8BWSNKP92             | -1.75719 | 0.023665 | 0.994352 | Down                                 |
| tRF-33-2V7KYUHRH7MSD2        | -4.17089 | 0.005219 | 0.732287 | Down                                 |
| tRF-28-30YOH9R8O7D2          | -1.37409 | 0.026869 | 0.994352 | Down                                 |
| tRF-20-51KHZKL6              | -2.22848 | 0.004146 | 0.732287 | Down                                 |
| tRF-24-76D7LYR1J2            | -1.61532 | 0.021236 | 0.994352 | Down                                 |
| tRF-18-BS6PDFD2              | 2.731926 | 0.032918 | 0.994352 | Up                                   |
| tRF-30-W4R951KHZKL6          | -1.56362 | 0.045747 | 0.994352 | Down                                 |
| tRF-27-4W9MVKS4I7K           | -1.73055 | 0.043812 | 0.994352 | Down                                 |
| tRF-20-79MP9PMN              | 1.551621 | 0.045563 | 0.994352 | Up                                   |
| tRF-37-82FN5KYUHRYWRYJ       | 1.64161  | 0.044008 | 0.994352 | Up                                   |
| tRF-34-LZNL7L73V6M9I3        | -1.21326 | 0.031627 | 0.994352 | Down                                 |
| tRF-35-Q99P9P9NH57S36        | -1.18254 | 0.0322   | 0.994352 | Down                                 |
| tRF-26-69JP4PRNFJB           | 2.371016 | 0.031754 | 0.994352 | Up                                   |
| tRF-25-R918VBY9PY            | 1.872183 | 0.036436 | 0.994352 | Up                                   |
| tRF-16-K578Q1B               | -1.79437 | 0.016991 | 0.90436  | Down                                 |
| tRF-30-IKE7UMKKSWRN          | -2.06621 | 0.043581 | 0.994352 | Down                                 |
| tRF-23-YOH9Q867D2            | -1.65263 | 0.027735 | 0.994352 | Down                                 |
| tRF-36-JKIWRNL3KQNK71B       | -1.42819 | 0.043082 | 0.994352 | Down                                 |
| tRF-20-D9WIRJ46              | -2.10277 | 0.049669 | 0.994352 | Down                                 |
| tRF-16-K5YY01B               | -3.49441 | 0.012994 | 0.888916 | Down                                 |
| tRF-27-1EWJQ72S3HM           | -3.20299 | 0.049369 | 0.994352 | Down                                 |
| tRF-39-Q99P9P9NH57S36F8      | -1.20613 | 0.029972 | 0.994352 | Down                                 |
| tRF-22-8BWS72092             | -1.09099 | 0.040016 | 0.994352 | Down                                 |
| tRF-28-3KYU8R6Q46D2          | -1.93938 | 0.004895 | 0.732287 | Down                                 |
| tRF-24-OPD8309N0Y            | 2.613822 | 0.015121 | 0.888916 | Up                                   |
| tRF-36-W6RM7KYUPRENHRD       | 2.513503 | 0.046036 | 0.994352 | Up                                   |
| tRF-34-1HPSR9O9337K0V        | -1.35274 | 0.033995 | 0.994352 | Down                                 |
| tRF-21-2EK8E0KRB             | -1.35395 | 0.037362 | 0.994352 | Down                                 |
| tRF-29-QSZ34KRQ59JM          | -1.69093 | 0.018066 | 0.925676 | Down                                 |
| tRF-28-QSZ34KRQ590K          | -2.42522 | 0.0028   | 0.697184 | Down                                 |
| tRF-30-F1R3WE8RO86J          | -1.8971  | 0.014002 | 0.888916 | Down                                 |
| tRF-30-J09HJHOJ7IR1          | -1.9285  | 0.008974 | 0.810691 | Down                                 |
| tRF-22-299DWUHSN             | 2.551047 | 0.049244 | 0.994352 | Up                                   |
| tRF-26-K87SERM492B           | 2.479175 | 0.040467 | 0.994352 | Up                                   |
| tRF-29-3K7SIR3DR2I2          | -2.47975 | 0.034913 | 0.994352 | Down                                 |
| tRF-27-Q0YOH9Q867J           | -2.11414 | 0.025231 | 0.994352 | Down                                 |
| tRF-29-K876DRMD5112          | -1.56758 | 0.012157 | 0.881827 | Down                                 |
| tRF-36-Q99P9P9NH57S36D       | -1.27485 | 0.022769 | 0.994352 | Down                                 |
| tRF-20-2EK8E0KR              | -1.69897 | 0.02005  | 0.994352 | Down                                 |
| tRF-22-79MP9PMNI             | 1.886745 | 0.013571 | 0.888916 | Up                                   |
| tRF-21-2E4V9K3RB             | -1.67141 | 0.02614  | 0.994352 | Down                                 |
| tRF-21-LB3KJBP1B             | 3.591705 | 0.0089   | 0.810691 | Up                                   |
| tRF-28-D89NJ4S2I7DM          | 1.28928  | 0.042262 | 0.994352 | Up                                   |
| tRF-34-YKWIR959MIL0HV        | -1.39329 | 0.015552 | 0.889325 | Down                                 |
| tRF-26-Q99P9P9NH50           | -4.17982 | 0.008374 | 0.798506 | Down                                 |
| tRF-20-2E4V9K3R              | -2.85905 | 0.007274 | 0.772832 | Down                                 |
| tRF-37-YO1N3KYUSR681SJ       | 2.2985   | 0.029364 | 0.994352 | Up                                   |
| tRF-21-LEK5YY01B             | -2.03164 | 0.039031 | 0.994352 | Down                                 |
| tRF-23-YU476YQSD2            | -1.99514 | 0.03473  | 0.994352 | Down                                 |
| tRF-25-R95R3JH926            | -1.96059 | 0.012428 | 0.881827 | Down                                 |
| tRF-20-7HFK8SR9              | -3.94477 | 0.025602 | 0.994352 | Down                                 |
| tRF-34-Q99P9P9NH57S15        | -1.15118 | 0.039956 | 0.994352 | Down                                 |
| tRF-26-5NL3489B3RB           | -1.38175 | 0.028287 | 0.994352 | Down                                 |
| tRF-18-PNR8YP04              | 3.530008 | 0.032583 | 0.994352 | Up                                   |
| tRF-26-HWH3RXSINHE           | 2.641773 | 0.043074 | 0.994352 | Up                                   |
| tRF-43-W282FN5KYUHRYWRYD2    | 1.788579 | 0.026335 | 0.994352 | Up                                   |
| tRF-37-Q99P9P9NH57S362       | -1.22558 | 0.028672 | 0.994352 | Down                                 |
| tRF-16-RZ3L7L0               | 1.614748 | 0.038148 | 0.994352 | Up                                   |

Table SI. Continued.

| Differentially expressed tRF | log2FC   | P-value  | FDR      | Direction of differential expression |
|------------------------------|----------|----------|----------|--------------------------------------|
| tRF-19-Z3RZ182X              | -1.89957 | 0.023478 | 0.994352 | Down                                 |
| tRF-32-Q99P9P9NH57SJ         | -1.34263 | 0.035549 | 0.994352 | Down                                 |
| tRF-22-Z3RZ18VBQ             | -1.86841 | 0.028053 | 0.994352 | Down                                 |
| tRF-32-5DMKYUYRLHR0J         | -1.35945 | 0.032508 | 0.994352 | Down                                 |
| tRF-27-18LPMBQ4NKJ           | -1.63255 | 0.021034 | 0.994352 | Down                                 |
| tRF-22-QNR8ZP9LL             | -2.02519 | 0.022619 | 0.994352 | Down                                 |
| tRF-23-YUS9R8B7D2            | -1.3835  | 0.036563 | 0.994352 | Down                                 |
| tRF-37-1OR6QOH04MR1J5J       | -3.85212 | 0.030875 | 0.994352 | Down                                 |
| tRF-29-5SVP9N15WVIP          | 2.493146 | 0.048453 | 0.994352 | Up                                   |
| tRF-42-YDLBRY73WEK5KKOV2     | -2.07827 | 0.036589 | 0.994352 | Down                                 |
| tRF-27-6978WPRLXN3           | -1.24099 | 0.041702 | 0.994352 | Down                                 |
| tRF-16-3WW4E1B               | -3.27671 | 0.043874 | 0.994352 | Down                                 |
| tRF-33-5DMKYUYRLHR0D2        | -1.1955  | 0.048574 | 0.994352 | Down                                 |
| tRF-25-Z3RZ18VBY9            | -1.65907 | 0.038658 | 0.994352 | Down                                 |
| tRF-29-8SR9BM32LJ1J          | -1.57647 | 0.015614 | 0.889325 | Down                                 |
| tRF-18-PRENHRD2              | -1.7087  | 0.016509 | 0.900682 | Down                                 |
| tRF-18-RKVP4PDY              | 3.496262 | 0.035742 | 0.994352 | Up                                   |

The criteria of  $\log_2FC > 1$  or  $< -1$  and  $P < 0.05$  were applied. AD, atopic dermatitis; tRF, transfer RNA derived fragment; FDR, false discovery rate; FC, fold change.

Table SII. Six types of differentially expressed tRFs identified in 3 patients with atopic dermatitis and 3 controls.

| tsRNA                        | Fragment sequence                        | Type  |
|------------------------------|------------------------------------------|-------|
| tsRNA-1042                   | AACCGAGCGTCCAAGCTCTTTCATTTT              | tRF-1 |
| tsRNA-1039                   | TCGAGAGGGGCTGTGCTCGCAAGGTTTCTTT          | tRF-1 |
| tRF-23-YOHR6HFRD2            | TTCAAATCCCGGACGAGCCCCCA                  | tRF-3 |
| tRF-23-7SIRM1DVV             | GTTCGATTCCCGGCCAATGCACC                  | tRF-3 |
| tRF-35-ZH0SR9593KMH26        | TTGCGACCCGGGTTTCGATTCCCGGGCGGCGCACCA     | tRF-3 |
| tRF-31-SWRNLJK578Q1B         | GTCGTGGGTTTCGAGCCCCACGTTGGGCGCCA         | tRF-3 |
| tRF-23-YOH9R8O7D2            | TTCAAATCTCGGTGGGACCTCCA                  | tRF-3 |
| tRF-24-7SFR06RDI2            | GTTCGAGCCCACCCAGGGACGCCA                 | tRF-3 |
| tRF-22-W0K6MY6V2;tsRNA-3016b | TCGAGCCCCACGTTGGGCGCCA                   | tRF-3 |
| tRF-33-QJ3KYU4RRWRBD2        | GCGGCCCGGGTTTCGACTCCCGGTGTGGGAACCA       | tRF-3 |
| tRF-39-D112Z4R95MK19K2V      | AAGCCAGGGATTGTGGGTTTCGAGTCCCACCTGGGGTACC | tRF-3 |
| tRF-20-BMWIRJ46              | AAATCTCGCTGGGGCCTCCA                     | tRF-3 |
| tRF-29-K87SHRMFWRE2          | CCCGGGTTCGATCCCCGGCATCTCCACCA            | tRF-3 |
| tRF-30-08R959KUMKF6          | ACCGGGTTCGATTCCCCGACGGGGAGCCA            | tRF-3 |
| tRF-37-YO1N7KYUSR0P1SJ       | TTCAAAGGTTGTGGGTTTCGAGTCCCACCAGAGTTCGCC  | tRF-3 |
| tRF-18-HRH7MSD2              | ATCCCATCCTCGTCGCCA                       | tRF-3 |
| tRF-24-7617M4O1J2            | GTTCAAGTCTCGGTGGAACCTCCA                 | tRF-3 |
| tRF-30-SV9NLN3JWB61          | GTCGCTGGTTCGATTCCCGCTCGAAGGACC           | tRF-3 |
| tRF-31-RR93W0K67205D         | GGTCCTGGGTTTCGAGCCCCAGTGAACCACC          | tRF-3 |
| tRF-16-HR6HFRD               | ATCCCGGACGAGCCCC                         | tRF-3 |
| tRF-20-593KMH26              | GATCCCGGGCGGCGCACCA                      | tRF-3 |
| tRF-21-LI38NJW1B             | CGACTCCTGGCTGGCTCGCCA                    | tRF-3 |
| tRF-31-OSRNLNKSEK51B         | GACCGGGTTCGATTCCCCGACGGGGAGCCA           | tRF-3 |
| tRF-24-19BMWIRJHJ            | AGTTCAAATCTCGCTGGGGCCTCC                 | tRF-3 |
| tRF-24-7SB1RFOJE2            | GTTCGAAACCGGGCAGAAGCACCA                 | tRF-3 |
| tRF-28-WIR959MIL0DR          | TCGCTGGTTCGATTCCGGCTCGAAGGAC             | tRF-3 |
| tRF-38-YO1N3KYUSR681SD2      | TTCAAAGGTTCCGGGTTTCGAGTCCCGGCGGAGTTCGCCA | tRF-3 |
| tRF-18-Y9Q867D2              | TTCTCGCTGGGGCCTCCA                       | tRF-3 |
| tRF-17-8SOUPR2               | TCCCGGACGAGCCCCCA                        | tRF-3 |
| tRF-27-L38BWSNKP92           | CGAGTTCAAATCTCGCTGGGGCCTCCA              | tRF-3 |
| tRF-27-M3WEKSPM852           | CGGGTTCGATCCCCGGCATCTCCACCA              | tRF-3 |
| tRF-17-8871KR2               | TCCGGGTGCCCCCCCA                         | tRF-3 |
| tRF-22-WEK5KKOV2             | TCGATCCCACCCAGGGACGCCA                   | tRF-3 |
| tRF-19-IRM1JVE2              | ATCCCGGCCCATGCACCA                       | tRF-3 |
| tRF-21-LM4V9K3RB             | CGATCCTCGCTGGGGCCTCCA                    | tRF-3 |
| tRF-22-8BWSNKP92             | TCAAATCTCGCTGGGGCCTCCA                   | tRF-3 |
| tRF-33-2V7KYUHRH7MSD2        | CACGCGTGGGTTTGAATCCCATCCTCGTCGCCA        | tRF-3 |
| tRF-28-30YOH9R8O7D2          | CCGAGTTCAAATCTCGGTGGGACCTCCA             | tRF-3 |
| tRF-20-51KHZKL6              | GAGCCCCACGTTGGGCGCCA                     | tRF-3 |
| tRF-24-76D7LYR1J2            | GTTCAAATCTCGCTGGGGCCTCCA                 | tRF-3 |
| tRF-18-BS6PDFD2              | AACCGGGCAGAAGCACCA                       | tRF-3 |
| tRF-30-W4R951KHZKL6          | TCGTGGGTTTCGAGCCCCACGTTGGGCGCCA          | tRF-3 |
| tRF-37-82FN5KYUHRYWRYJ       | TCAGAAGATTGAGGGTTTGAATCCCTTCGTGGTTGCC    | tRF-3 |
| tRF-16-K578Q1B               | CCCACGTTGGGCGCCA                         | tRF-3 |
| tRF-23-YOH9Q867D2            | TTCAAATCTCGCTGGGGCCTCCA                  | tRF-3 |
| tRF-36-JKIWRNL3KQNK71B       | CAGGGATTGTGGGTTTCGAGTCCCATCTGGGGTGCCA    | tRF-3 |
| tRF-20-D9WIRJ46              | AATCTCGCTGGGGCCTCCA                      | tRF-3 |
| tRF-16-K5YY01B               | CCCACTTCTGACACCA                         | tRF-3 |
| tRF-22-8BWS72092             | TCAAATCTCGGTGGAACCTCCA                   | tRF-3 |
| tRF-28-3KYU8R6Q46D2          | CCGGGTTTCGATCCCCGGCATCTCCACCA            | tRF-3 |
| tRF-36-W6RM7KYUPRENHRD       | TCTCAGGGTTCGTGGGTTTCGAGCCCCACGTTGGGCGC   | tRF-3 |
| tRF-34-1HPSR9O9337K0V        | AGGCGGCCCGGGTTCGACTCCCGGTGTGGGAACC       | tRF-3 |
| tRF-21-2EK8E0KRB             | CAAATCCCGGACGAGCCCCCA                    | tRF-3 |
| tRF-30-F1R3WE8RO86J          | AGACCGGGTTCGATTCCCCGACGGGGAGC            | tRF-3 |
| tRF-29-3K7SIR3DR2I2          | CCGGGGTTCGATTCCCCGACGGGGAGCCA            | tRF-3 |
| tRF-27-Q0YOH9Q867J           | GCGAGTTCAAATCTCGCTGGGGCCTCC              | tRF-3 |
| tRF-29-K876DRMD5112          | CCCGGGTCAAATCCCCGACGAGCCCCCA             | tRF-3 |
| tRF-20-2EK8E0KR              | CAAATCCCGGACGAGCCCC                      | tRF-3 |
| tRF-21-2E4V9K3RB             | CAAATCTCGCTGGGGCCTCCA                    | tRF-3 |

Table SII. Continued.

| tsRNA                       | Fragment sequence                                      | Type      |
|-----------------------------|--------------------------------------------------------|-----------|
| tRF-21-LB3KJBP1B            | CGAAACCGGGCAGAAGCACCA                                  | tRF-3     |
| tRF-34-YKWIR959MIL0HV       | TTAGGTCGCTGGTTCGATTCCGGCTCGAAGGACC                     | tRF-3     |
| tRF-20-2E4V9K3R             | CAAATCTCGCTGGGGCCTCC                                   | tRF-3     |
| tRF-37-YO1N3KYUSR681SJ      | TTCAAAGGTTCCGGGTTTCGAGTCCCGGCGGAGTCGCC                 | tRF-3     |
| tRF-21-LEK5YY01B            | CGAATCCCACCTTCTGACACCA                                 | tRF-3     |
| tRF-23-YU476YQSD2           | TTCGACTCCTGGCTGGCTCGCCA                                | tRF-3     |
| tRF-25-R95R3JH926           | GGTTCGATCCCCGGCATCTCCACCA                              | tRF-3     |
| tRF-26-5NL3489B3RB          | GAGTTCGAGTCTCGGTGGAACCTCCA                             | tRF-3     |
| tRF-32-5DMKYUYRLHR0J        | GAGACCGGGTTCGATTCCCCGACGGGGAGCC                        | tRF-3     |
| tRF-23-YUS9R8B7D2           | TTCGAGTCTCGGTGGAACCTCCA                                | tRF-3     |
| tRF-16-3WW4E1B              | CCTGTTCGTGACGCCA                                       | tRF-3     |
| tRF-33-5DMKYUYRLHR0D2       | GAGACCGGGTTCGATTCCCCGACGGGGAGCCA                       | tRF-3     |
| tRF-29-8SR9BM32LJ1J         | TCCCGGGTTCAAATCCCGGACGAGCCCC                           | tRF-3     |
| tRF-18-PRENRHD2             | GCCCCACGTTGGGCGCCA                                     | tRF-3     |
| tRF-24-0P58309N0Y           | ACCAGGATGGCCGAGTGGTTAAGG                               | tRF-5     |
| tRF-18-RKVP4P04             | GGGGGTATAGCTCAGTGG                                     | tRF-5     |
| tRF-20-PJ58309N             | GCAGCGATGGCCGAGTGGTT                                   | tRF-5     |
| tRF-17-69JP4P4              | GGCTCCATAGCTCAGGG                                      | tRF-5     |
| tRF-30-PNR8YO9LON4V         | GCATTGGTGGTTCAATGGTAGAATTCTCGC                         | tRF-5     |
| tRF-50-QNR8VP94FQFY392J1Y0S | GCGTTGGTGGTATAGTGGTGAGCATAGCTGCCTTC<br>CAAGCAGTTGACCCG | tRF-5     |
| tRF-20-79MP9PMN             | GTTTCCGTAGTGTAGCGGTT                                   | tRF-5     |
| tRF-26-69JP4PRNFJB          | GGCTCCATAGCTCAGGGGTTAGAGCA                             | tRF-5     |
| tRF-39-Q99P9P9NH57S36F8     | GCTTCTGTAGTGTAGTGGTTATCACGTTTCGCCTCACACG               | tRF-5     |
| tRF-24-0PD8309N0Y           | ACCAGAATGGCCGAGTGGTTAAGG                               | tRF-5     |
| tRF-36-Q99P9P9NH57S36D      | GCTTCTGTAGTGTAGTGGTTATCACGTTTCGCCTCAC                  | tRF-5     |
| tRF-22-79MP9PMNI            | GTTTCCGTAGTGTAGCGGTTAT                                 | tRF-5     |
| tRF-26-Q99P9P9NH50          | GCTTCTGTAGTGTAGTGGTTATCACG                             | tRF-5     |
| tRF-18-PNR8YP04             | GCATTGGTGGTTCAGTGG                                     | tRF-5     |
| tRF-37-Q99P9P9NH57S362      | GCTTCTGTAGTGTAGTGGTTATCACGTTTCGCCTCACA                 | tRF-5     |
| tRF-16-RZ3L7L0              | GGTTTCCGTAGTGTAG                                       | tRF-5     |
| tRF-22-QNR8ZP9LL            | GCGTTGGTGGTTTAGTGGTAGA                                 | tRF-5     |
| tRF-37-1OR6QOH04MR1J5J      | AGTAAGGTCAGCTAAATAAGCTATCGGGCCCATACCC                  | tRF-5     |
| tRF-27-6978WPRLXN3          | GGCTCGTTGGTCTAGGGGTATGATTCT                            | tRF-5     |
| tRF-18-RKVP4PDY             | GGGGGTATAGCTCAGGGG                                     | tRF-5     |
| tRF-39-81PV6RRNLNK88KHR     | TCACCGCCGCGGCCCGGGTTCGATTCCCGGTCAGGGAAC                | 3'-halves |
| tRF-43-W282FN5KYUHRYWRYD2   | TCGGATCAGAAGATTGAGGGTTCGAATCCCTTCGTGGTTGCCA            | 3'-halves |
| tRF-42-YDLBRY73WEK5KKOV2    | TTAACCGAAAGGTTGGTGGTTCGATCCACCCAGGGACGCCA              | 3'-halves |
| tRF-33-Q99P9P9NH57SD3       | GCTTCTGTAGTGTAGTGGTTATCACGTTTCGCCT                     | 5'-halves |
| tRF-34-LR6XQ6S8V0J8HW       | CGCCCCGCTAGCTCAGTCCGTAGAGCATGGGACT                     | 5'-halves |
| tRF-34-LZNL7L73V6M9I3       | CGCTTCTGTAGTGTAGTGGTTATCACGTTTCGCCT                    | 5'-halves |
| tRF-35-Q99P9P9NH57S36       | GCTTCTGTAGTGTAGTGGTTATCACGTTTCGCCTCA                   | 5'-halves |
| tRF-34-Q99P9P9NH57S15       | GCTTCTGTAGTGTAGTGGTTATCACGTTTCGCCTC                    | 5'-halves |
| tRF-32-Q99P9P9NH57SJ        | GCTTCTGTAGTGTAGTGGTTATCACGTTTCGCC                      | 5'-halves |
| tRF-28-8W1W18YMENDM         | TCCGTAGTGTAGTGGTTATCACGTTTCGC                          | i-tRF     |
| tRF-26-7JPJ60MV9JD          | GTGGCGCAGCGGAAGCGTGCTGGGCC                             | i-tRF     |
| tRF-25-6VF8DHXY6R           | GGCGCAGCGGAAGCGTGCTGGGCC                               | i-tRF     |
| tRF-28-4W9MVKS4I7D4         | CTCGTTGGTCTAGGGGTATGATTCTCGG                           | i-tRF     |
| tRF-18-R2YJ8B04             | GGGGATTAGCTCAAATGG                                     | i-tRF     |
| tRF-16-R2YJ8BE              | GGGGATTAGCTCAAAT                                       | i-tRF     |
| tRF-30-924ZDRJKW4R9         | TGGGACTCTTAATCCAGGGTTCGTGGGTTC                         | i-tRF     |
| tRF-29-QSZ34KRQ59J4         | GCTCGTTGGTCTAGGGGTATGATTCTCGG                          | i-tRF     |
| tRF-22-YO9LON4V3            | TTCAATGGTAGAATTCTCGCT                                  | i-tRF     |
| tRF-26-18LPMBQ4NKD          | AGTGGCGCAGCGGAAGCGTGCTGGGC                             | i-tRF     |
| tRF-23-YRL51NLED3           | TTCCCCGCACAGGTTTCAATCCT                                | i-tRF     |
| tRF-32-I7XUK87SIRMJ4        | ATTCTTGCGACCCGGGTTTCGATTCCCGGGCGG                      | i-tRF     |
| tRF-27-WJ9X0UD394N          | TCGGCTGTTAACCGAAAGGTTGGTGGT                            | i-tRF     |
| tRF-30-8HM2OSRNLNKS         | TCACGCGGGAGACCGGGGTTTCGATTCCCCG                        | i-tRF     |
| tRF-23-R2YJ8B9LDS           | GGGGATTAGCTCAAATGGTAGAG                                | i-tRF     |

Table SII. Continued.

| tsRNA               | Fragment sequence              | Type  |
|---------------------|--------------------------------|-------|
| tRF-30-4W9MVKS4I7MN | CTCGTTGGTCTAGGGGTATGATTCTCGGTT | i-tRF |
| tRF-27-4W9MVKS4I7K  | CTCGTTGGTCTAGGGGTATGATTCTCG    | i-tRF |
| tRF-25-R918VBY9PY   | GGTTCAGTGGTAGAATTCTCGCCTG      | i-tRF |
| tRF-30-IKE7UMKKSWRN | ATGGGACTCTTAATCCCAGGGTCGTGGGTT | i-tRF |
| tRF-27-1EWJQ72S3HM  | AGGATTCGGCGCTCTCACCGCCGCGGC    | i-tRF |
| tRF-29-QSZ34KRQ59JM | GCTCGTTGGTCTAGGGGTATGATTCTCGC  | i-tRF |
| tRF-28-QSZ34KRQ590K | GCTCGTTGGTCTAGGGGTATGATTCTCG   | i-tRF |
| tRF-30-J09HJHOJ7IR1 | CAGAGTGGCGCAGCGGAAGCGTGCTGGGCC | i-tRF |
| tRF-22-299DWUHSN    | CACTCTGGACTCTGAATCCGGT         | i-tRF |
| tRF-26-K87SERM492B  | CCCGGGTTCGACTCCCGGTGTGGGAA     | i-tRF |
| tRF-28-D89NJ4S2I7DM | AATGGTGGTTCAGTGGTAGAATTCTCGC   | i-tRF |
| tRF-20-7HFK8SR9     | GTGCGAGAGGTCCCGGGTTC           | i-tRF |
| tRF-26-HWH3RXSINHE  | ATCGTATAGTGGTTAGTACTCTGCGT     | i-tRF |
| tRF-19-Z3RZ182X     | TTGGTGGTTTAGTGGTAGA            | i-tRF |
| tRF-22-Z3RZ18VBQ    | TTGGTGGTTTAGTGGTAGAATT         | i-tRF |
| tRF-27-18LPMBQ4NKJ  | AGTGGCGCAGCGGAAGCGTGCTGGGCC    | i-tRF |
| tRF-29-5SVP9N15WVIP | GATCGTATAGTGGTTAGTACTCTGCGCTG  | i-tRF |
| tRF-25-Z3RZ18VBY9   | TTGGTGGTTTAGTGGTAGAATTCTC      | i-tRF |

tRF, transfer RNA-derived fragment.
